# Supplementary material for: Regional to global distributions, trends, and drivers of biogenic volatile organic compound emission from 2001 to 2020
Source: Copernicus journal article supplement (doi:10.5194/egusphere-2023-1830), 2023-08-11
Supplement: Supplementary file 1 [file egusphere-2023-1830-supplement.pdf]

*Supplement of*

**Regional to global distributions, trends, and drivers of biogenic volatile organic compound emission from 2001 to 2020**

**Hao Wang et al.**

5 *Correspondence to:* Xiaohong Liu (xiaohong.liu@tamu.edu)

**Table S1: Summary of isoprene emission site observations collected from the literature (mg C m<sup>-2</sup>·day<sup>-1</sup>).**

| Date                  | Location           | PFTs  | Emissions | References              |
|-----------------------|--------------------|-------|-----------|-------------------------|
| 2001/02               | [25°S, 31.5°E]     | EBF   | 1.5       | (Harley et al., 2003)   |
| 2002/08/13-2002/08/31 | [42.0°N, 116.3°E]  | Grass | 6.4       | (Bai et al., 2003)      |
| 2003/04/16-2003/05/05 | [10.4°N, 84.0°W]   | EBF   | 6.0       | (Karl et al., 2004)     |
| 2001/08/02-2001/08/12 | [61.9°N, 24.3°E]   | ENF   | 0.6       | (Spirig et al., 2004)   |
| 2002/07/08-2002/07/18 | [21.9°N, 101.3°E]  | DBF   | 10.0      | (Baker et al., 2005)    |
| 2002/06/06-2002/09/21 | [45.5°N, 84.7°W]   | DBF   | 26.4      | (Pressley et al., 2005) |
| 2003/07/13-2003/07/24 | [50°N, 6°E]        | DBF   | 26.9      | (Spirig et al., 2005)   |
| 2004/9/14-2004/9/29   | [2.6°S, 60.2°W]    | EBF   | 20.6      | (Karl et al., 2007)     |
| 2007/12/15-2007/12/19 | [3°N, 102.3°E]     | EBF   | 7.4       | (Saito et al., 2008)    |
| 2006/08/01-2006/09/19 | [68.3°N, 19.1°E]   | Grass | 2.9       | (Holst et al., 2010)    |
| 2008/06/20-2008/07/20 | [5.0°N, 117.8°E]   | EBF   | 11.4      | (Langford et al., 2010) |
| 2007/06-2007/08       | [42.9°N, 72.2°W]   | DBF   | 19.4      | (McKinney et al., 2011) |
| 2008/05/30-2008/06/11 | [5.2°N, 118.5°E]   | EBF   | 42.8      | (Misztal et al., 2011)  |
| 2002/06/26-2002/06/28 | [43.7°N, 116.6°E]  | Grass | 7.0       | (Bai, 2015)             |
| 2010/06/19-2010/06/30 | [42.4°N, 128.1°E]  | DBF   | 5.6       | (Bai et al., 2015)      |
| 2010/09/02-2011/01/27 | [2.6°S, 60.1°W]    | EBF   | 5.1       | (Alves et al., 2016)    |
| 2012/07/07-2012/07/13 | [30.3°N, 119.57°E] | EBF   | 12.4      | (Bai et al., 2016)      |
| 2005/07/15-2005/08/16 | [51.17°N, 0.85°W]  | DBF   | 16.8      | (Langford et al., 2017) |
| 2011/09/13-2011/10/01 | [41.74°N, 12.4°E]  | DBF   | 0.7       | (Langford et al., 2017) |
| 2012/06/13-2012/07/12 | [45.2°N, 10.74°E]  | DBF   | 15.0      | (Langford et al., 2017) |
| 2012/06/09-2012/06/11 | [43.94°N, 5.71°E]  | DBF   | 20.8      | (Langford et al., 2017) |
| 2012/07-2012/08       | [38.74°N, 92.2°W]  | DBF   | 47.3      | (Zheng et al., 2017)    |
| 2013/06-2013/12       | [2.6°S, 60.2°W]    | EBF   | 50.0      | (Alves et al., 2018)    |
| 2013/06/11-2013/06/26 | [45.81°N, 8.63°E]  | DBF   | 27.0      | (Jensen et al., 2018)   |

|                       |                    |     |      |                         |
|-----------------------|--------------------|-----|------|-------------------------|
| 2015/05/08-2015/05/25 | [39.32°N,86.42°W]  | DBF | 29.2 | (Stoy et al., 2021)     |
| 2013/09-2014/07       | [2.59°S,8.60.21°W] | EBF | 17.9 | (Langford et al., 2022) |

**Table S2. Summary of monoterpenes emission site observations collected from the literature (mg C m<sup>-2</sup>·day<sup>-1</sup>).**

| Date                  | Location          | PFTs | Emissions | References              |
|-----------------------|-------------------|------|-----------|-------------------------|
| 2003/04/16-2003/05/05 | [10.4°N, 84.0°W]  | EBF  | 0.44      | (Karl et al., 2004)     |
| 2001/08/02-2001/08/12 | [61.9°N, 24.3°E]  | ENF  | 2.12      | (Spirig et al., 2004)   |
| 2003/07/13-2003/07/24 | [50°N, 6°E]       | DBF  | 8.60      | (Spirig et al., 2005)   |
| 2004/9/14-2004/9/29   | [2.6°S, 60.2°W]   | EBF  | 3.20      | (Karl et al., 2007)     |
| 2000/04/20-2008/05/07 | [5.0°N, 117.8°E]  | EBF  | 1.50      | (Langford et al., 2010) |
| 2008/06/20-2008/07/20 | [5.0°N, 117.8°E]  | EBF  | 2.80      | (Langford et al., 2010) |
| 2007/06-2007/08       | [42.9°N, 72.2°W]  | DBF  | 0.66      | (McKinney et al., 2011) |
| 2010/06/19-2010/06/30 | [42.4°N, 128.1°E] | DBF  | 0.86      | (Bai et al., 2015)      |
| 2010/09/02-2011/01/27 | [2.6°S, 60.1°W]   | EBF  | 4.80      | (Alves et al., 2016)    |
| 2012/07/07-2012/07/13 | [30.3°N,119.57°E] | EBF  | 0.05      | (Bai et al., 2016)      |
| 2013/06/11-2013/06/26 | [45.81°N,8.63°E]  | DBF  | 0.83      | (Jensen et al., 2018)   |

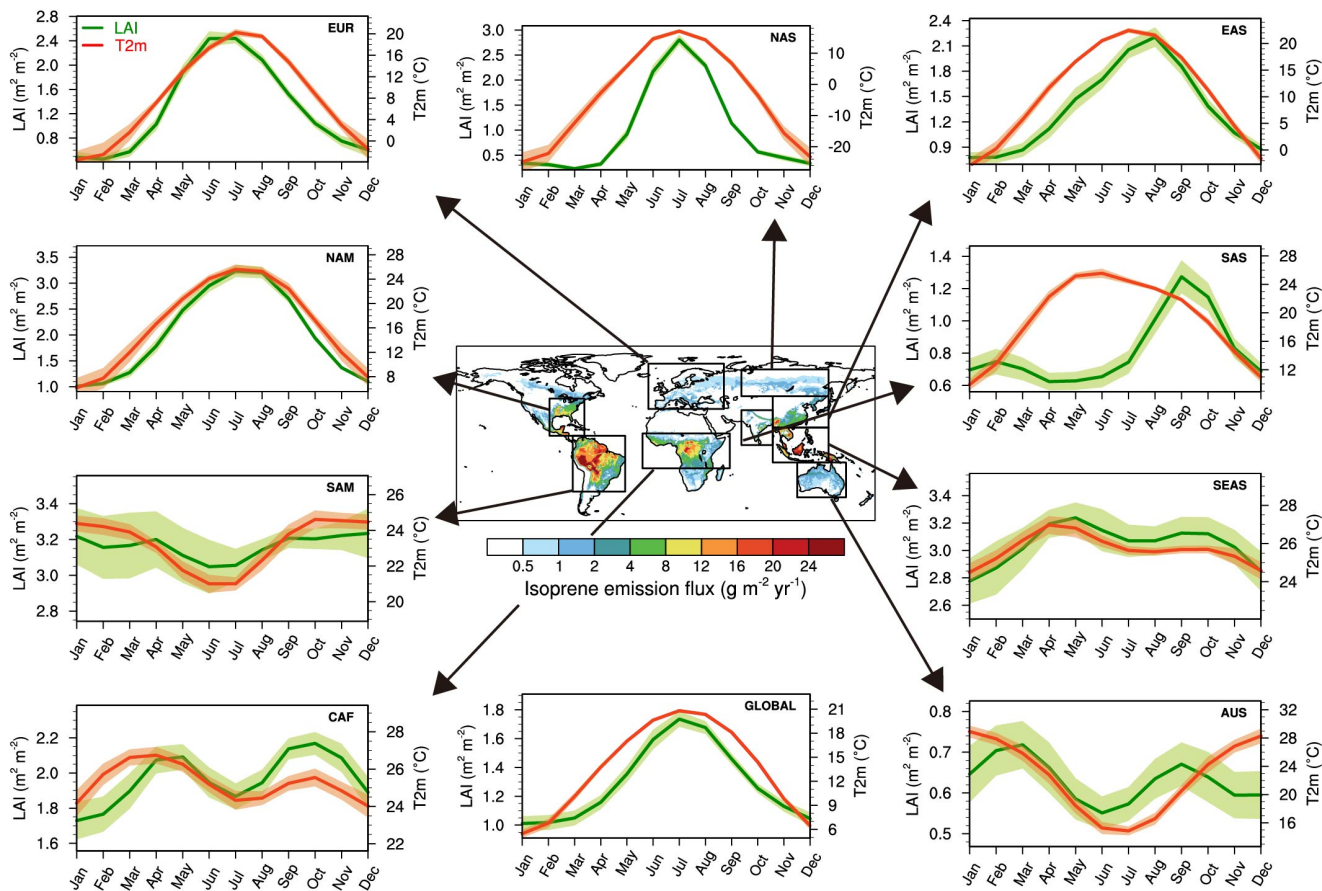

10

**Figure S1: The seasonal variation of leaf area index (LAI) and surface 2 m temperature (T2m) for each region outlined in black on the map during 2001-2020. The shaded area represents one standard deviation. The nine regions are listed below: NAM: North America; EUR: Europe; NAS: North Asia; EAS: East Asia; SAS: South Asia; SEAS: Southeast Asia; SAM: South America; CAF: Central Africa; AUS: Australia.**

15

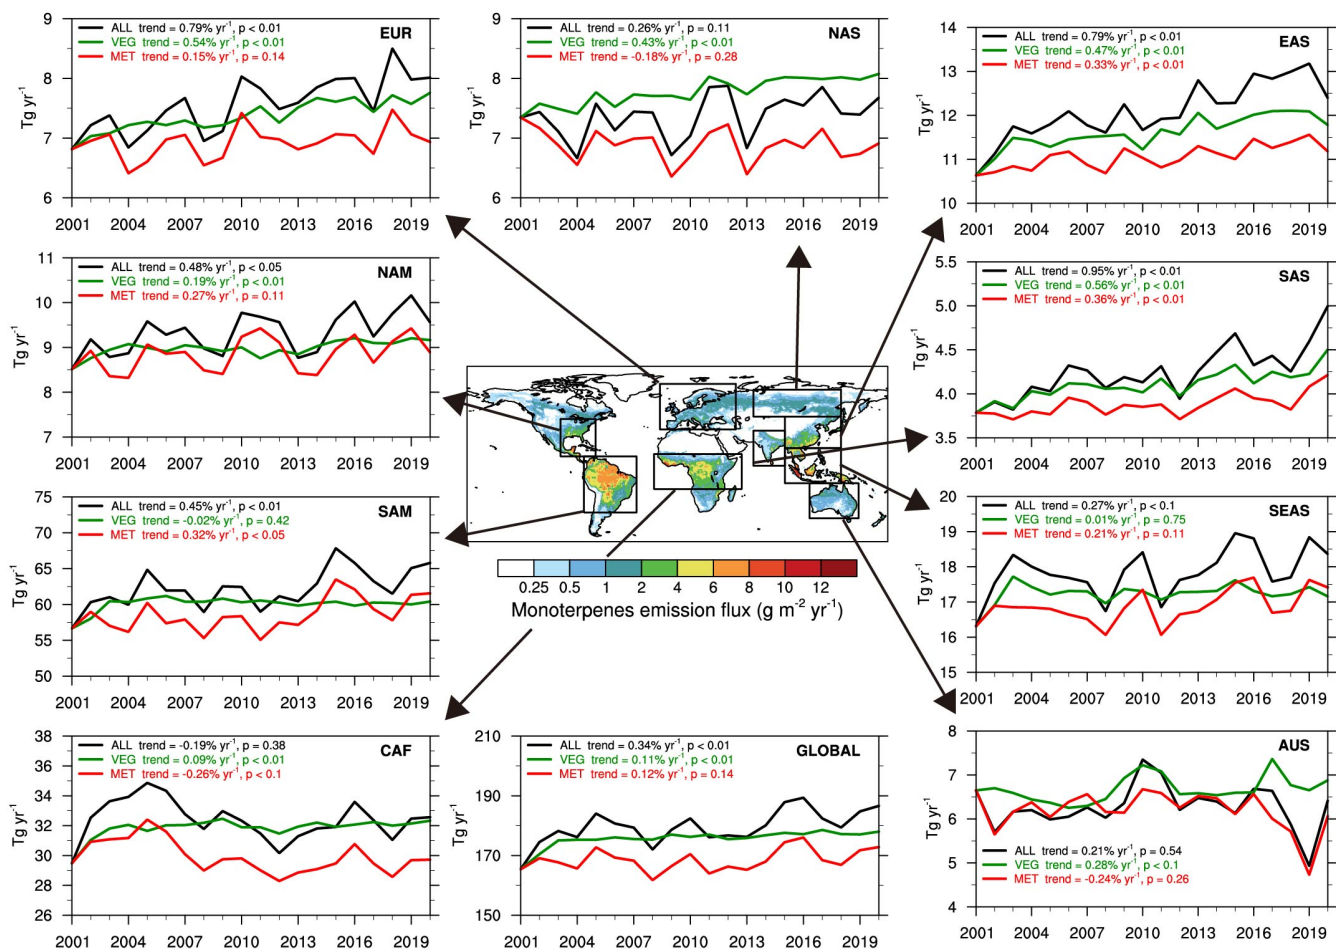

20 **Figure S2: Interannual variation and trends in regional monoterpenes emissions for each region outlined by black rectangles on the map. Trends are expressed by the relative change in percentage (i.e., the linear change during 2001-2020 divided by the mean value). p-values denote statistically significant levels using the Mann-Kendall test. ALL represents simulated results considering interannual variability of all drivers (i.e., vegetation, meteorology), while VEG and MET represent simulated results considering only interannual variability of vegetation and meteorology, respectively.**

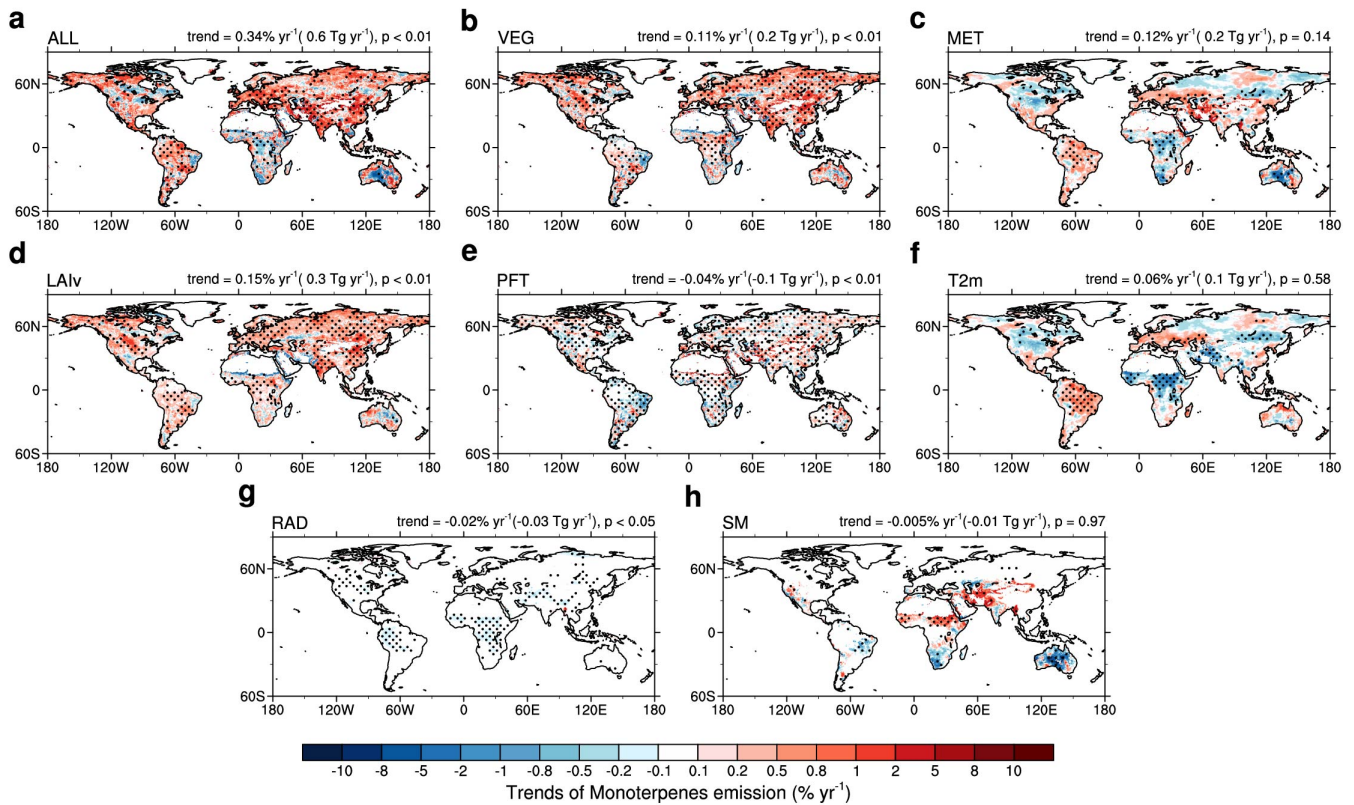

25 **Figure S3: Spatial distribution of monoterpene emission trends from 2001 to 2020. (a) ALL** represents simulated results considering interannual variability of all drivers. **(b, c) VEG** and **MET** represent simulated trends when considering only  
 30 interannual variability of vegetation and meteorology, respectively. **(d, e)** Contributions from individual vegetation parameters including **LAIv** (leaf area index of vegetation covered surfaces) and **PFT** (plant functional types). **(f, g, and h)** Contributions from individual meteorological factors including **T2m** (surface 2 m temperature), **RAD** (surface solar radiation), and **SM** (soil moisture). Stippling denotes regions where the trend is statistically significant ( $p < 0.1$ ) using the Mann-Kendall test. Trends are expressed by the relative change in percentage (i.e., the linear change during 2001–2020 divided by the mean value) and absolute change.  $p$ -values represent statistically significant levels using the Mann-Kendall test.

## Trends of Monoterpenes emission during 2001-2020

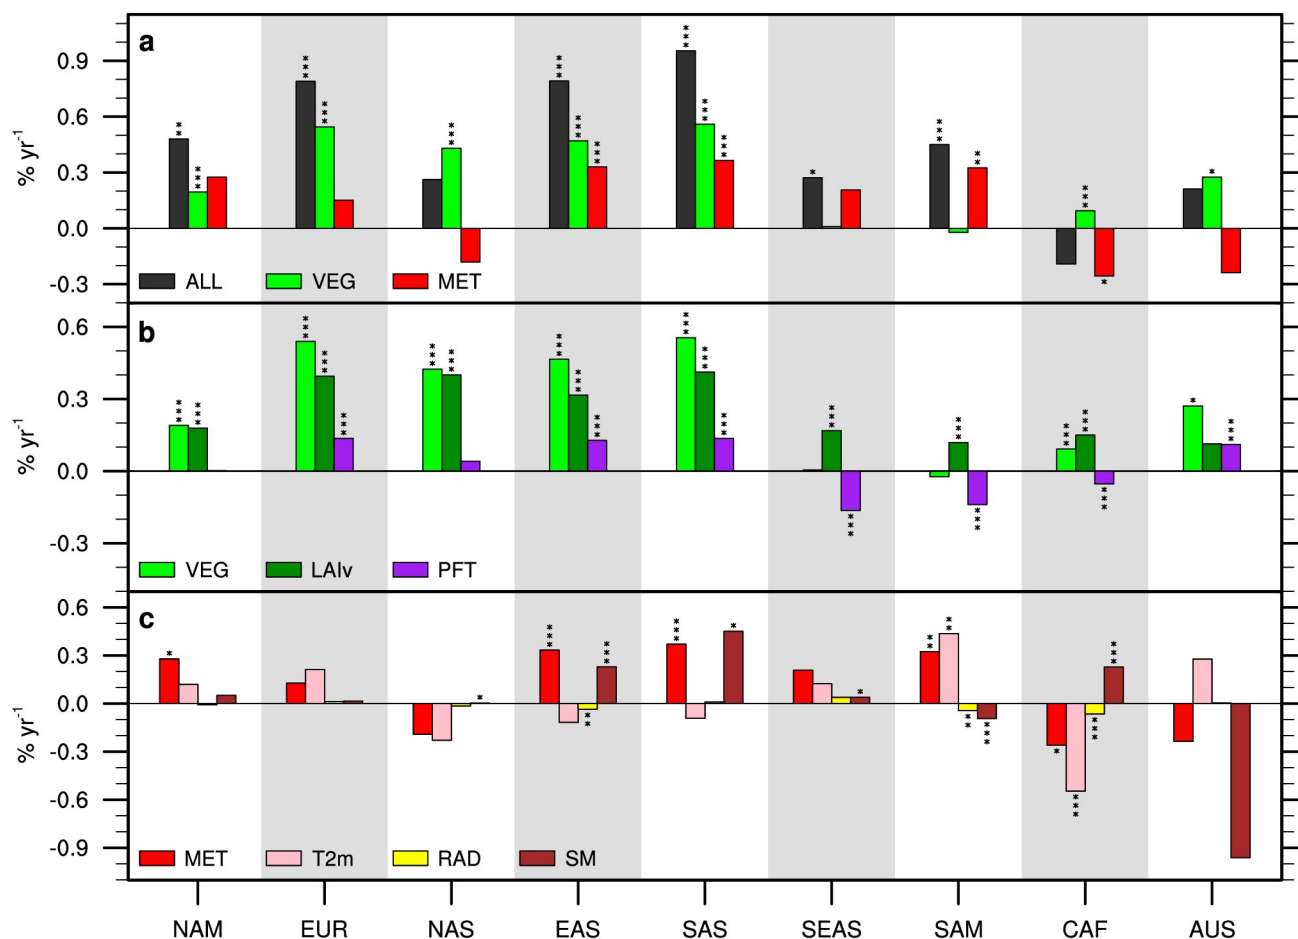

35 **Figure S4: Trends of monoterpenes emissions and associated influencing factors from 2001–2020 in nine regions. (a) ALL**  
**represents simulated results considering interannual variability of all drivers, while VEG and MET represent simulated results**  
**considering only interannual variability of vegetation and meteorology, respectively. (b) Contributions from individual vegetation**  
**parameters including LAIv (leaf area index of vegetation covered surfaces) and PFT (plant functional types). (c) Contributions**  
**from individual meteorological factors including T2m (surface 2 m temperature), RAD (surface solar radiation), and SM (soil**  
**moisture). (d) Trends of individual influencing factors including vegetation parameters and meteorological factors. Tree, shrub,**  
**grass, and crop represent the four plant functional types (PFTs). The single, double, and triple asterisks denote 90%, 95%, and 99%**  
**confidence levels (CI) using the Mann-Kendall test, respectively.**  
40

## References

Alves, E. G., Jardine, K., Tota, J., Jardine, A., Yáñez-Serrano, A. M., Karl, T., Tavares, J., Nelson, B., Gu, D., Stavrou, T., Martin, S., Artaxo, P., Manzi, A., and Guenther, A.: Seasonality of isoprenoid emissions from a primary rainforest in central Amazonia, *Atmos. Chem. Phys.*, 16, 3903-3925, 10.5194/acp-16-3903-2016, 2016.

- 45 Alves, E. G., Tóta, J., Turnipseed, A., Guenther, A. B., Vega Bustillos, J. O. W., Santana, R. A., Cirino, G. G., Tavares, J. V.,  
Lopes, A. P., Nelson, B. W., de Souza, R. A., Gu, D., Stavrakou, T., Adams, D. K., Wu, J., Saleska, S., and Manzi, A.  
O.: Leaf phenology as one important driver of seasonal changes in isoprene emissions in central Amazonia,  
*Biogeosciences*, 15, 4019-4032, 10.5194/bg-15-4019-2018, 2018.
- Bai, J.: Estimation of the isoprene emission from the Inner Mongolia grassland, *Atmos. Pollut. Res.*, 6, 406-414,  
50 <https://doi.org/10.5094/APR.2015.045>, 2015.
- Bai, J., Guenther, A., Turnipseed, A., and Duhl, T.: Seasonal and interannual variations in whole-ecosystem isoprene and  
monoterpene emissions from a temperate mixed forest in Northern China, *Atmos. Pollut. Res.*, 6, 696-707,  
<https://doi.org/10.5094/APR.2015.078>, 2015.
- Bai, J., Guenther, A., Turnipseed, A., Duhl, T., Yu, S., and Wang, B.: Seasonal variations in whole-ecosystem BVOC  
55 emissions from a subtropical bamboo plantation in China, *Atmos. Environ.*, 124, 12-21,  
<https://doi.org/10.1016/j.atmosenv.2015.11.008>, 2016.
- Bai, J. H., Wang, G. C., Ren, L. X., Baker, B., Zimmerman, P., and Liang, B. S.: The emission flux of volatile organic  
compounds in the Inner Mongolia Grassland, *Huan jing ke xue*, 24(6), 16-22, 2003, (In Chinese).
- Baker, B., Bai, J.-H., Johnson, C., Cai, Z.-T., Li, Q.-J., Wang, Y.-F., Guenther, A., Greenberg, J., Klinger, L., Geron, C., and  
60 Rasmussen, R.: Wet and dry season ecosystem level fluxes of isoprene and monoterpenes from a southeast Asian  
secondary forest and rubber tree plantation, *Atmos. Environ.*, 39, 381-390,  
<https://doi.org/10.1016/j.atmosenv.2004.07.033>, 2005.
- Harley, P., Otter, L., Guenther, A., and Greenberg, J.: Micrometeorological and leaf-level measurements of isoprene  
emissions from a southern African savanna, *J. Geophys. Res.-Atmos.*, 108, <https://doi.org/10.1029/2002JD002592>,  
65 2003.
- Holst, T., Arneth, A., Hayward, S., Ekberg, A., Mastepanov, M., Jackowicz-Korczynski, M., Friborg, T., Crill, P. M., and  
Bäckstrand, K.: BVOC ecosystem flux measurements at a high latitude wetland site, *Atmos. Chem. Phys.*, 10, 1617-  
1634, 10.5194/acp-10-1617-2010, 2010.
- Jensen, N. R., Gruening, C., Goded, I., Müller, M., Hjorth, J., and Wisthaler, A.: Eddy-covariance flux measurements in an  
70 Italian deciduous forest using PTR-ToF-MS, PTR-QMS and FIS, *Int. J. Environ. Anal. Chem.*, 98, 758-788,  
10.1080/03067319.2018.1502758, 2018.
- Karl, T., Guenther, A., Yokelson, R. J., Greenberg, J., Potosnak, M., Blake, D. R., and Artaxo, P.: The tropical forest and fire  
emissions experiment: Emission, chemistry, and transport of biogenic volatile organic compounds in the lower  
atmosphere over Amazonia, *J. Geophys. Res.-Atmos.*, 112, <https://doi.org/10.1029/2007JD008539>, 2007.
- 75 Karl, T., Potosnak, M., Guenther, A., Clark, D., Walker, J., Herrick, J. D., and Geron, C.: Exchange processes of volatile  
organic compounds above a tropical rain forest: Implications for modeling tropospheric chemistry above dense  
vegetation, *J. Geophys. Res.-Atmos.*, 109, <https://doi.org/10.1029/2004JD004738>, 2004.



- Langford, B., Misztal, P. K., Nemitz, E., Davison, B., Helfter, C., Pugh, T. A. M., MacKenzie, A. R., Lim, S. F., and Hewitt, C. N.: Fluxes and concentrations of volatile organic compounds from a South-East Asian tropical rainforest, *Atmos. Chem. Phys.*, 10, 8391-8412, 10.5194/acp-10-8391-2010, 2010.
- Langford, B., Cash, J., Acton, W. J. F., Valach, A. C., Hewitt, C. N., Fares, S., Goded, I., Gruening, C., House, E., Kalogridis, A. C., Gros, V., Schafers, R., Thomas, R., Broadmeadow, M., and Nemitz, E.: Isoprene emission potentials from European oak forests derived from canopy flux measurements: an assessment of uncertainties and inter-algorithm variability, *Biogeosciences*, 14, 5571-5594, 10.5194/bg-14-5571-2017, 2017.
- Langford, B., House, E., Artaxo, P., Barkley, M., Brito, J., Davison, B., Hewitt, N., MacKenzie, R., Marais, E., Newland, M., Rickard, A., Shaw, M., Valach, A., Yañez-Serrano, A. M., and Nemitz, E.: Seasonality of isoprene oxidation chemistry in the remote Amazon is mediated by anthropogenic pollution, *Environ. Sci.: Atmos.*, 230-240, <https://doi.org/10.1039/D1EA00057H>, 2022.
- McKinney, K. A., Lee, B. H., Vasta, A., Pho, T. V., and Munger, J. W.: Emissions of isoprenoids and oxygenated biogenic volatile organic compounds from a New England mixed forest, *Atmos. Chem. Phys.*, 11, 4807-4831, 10.5194/acp-11-4807-2011, 2011.
- Misztal, P. K., Nemitz, E., Langford, B., Di Marco, C. F., Phillips, G. J., Hewitt, C. N., MacKenzie, A. R., Owen, S. M., Fowler, D., Heal, M. R., and Cape, J. N.: Direct ecosystem fluxes of volatile organic compounds from oil palms in South-East Asia, *Atmos. Chem. Phys.*, 11, 8995-9017, 10.5194/acp-11-8995-2011, 2011.
- Pressley, S., Lamb, B., Westberg, H., Flaherty, J., Chen, J., and Vogel, C.: Long-term isoprene flux measurements above a northern hardwood forest, *J. Geophys. Res.-Atmos.*, 110, <https://doi.org/10.1029/2004JD005523>, 2005.
- Saito, T., Yokouchi, Y., Kosugi, Y., Tani, M., Philip, E., and Okuda, T.: Methyl chloride and isoprene emissions from tropical rain forest in Southeast Asia, *Geophys. Res. Lett.*, 35, <https://doi.org/10.1029/2008GL035241>, 2008.
- Spirig, C., Guenther, A., Greenberg, J. P., Calanca, P., and Tarvainen, V.: Tethered balloon measurements of biogenic volatile organic compounds at a Boreal forest site, *Atmos. Chem. Phys.*, 4, 215-229, 10.5194/acp-4-215-2004, 2004.
- Spirig, C., Neftel, A., Ammann, C., Dommen, J., Grabmer, W., Thielmann, A., Schaub, A., Beauchamp, J., Wisthaler, A., and Hansel, A.: Eddy covariance flux measurements of biogenic VOCs during ECHO 2003 using proton transfer reaction mass spectrometry, *Atmos. Chem. Phys.*, 5, 465-481, 10.5194/acp-5-465-2005, 2005.
- Stoy, P. C., Trowbridge, A. M., Siqueira, M. B., Freire, L. S., Phillips, R. P., Jacobs, L., Wiesner, S., Monson, R. K., and Novick, K. A.: Vapor pressure deficit helps explain biogenic volatile organic compound fluxes from the forest floor and canopy of a temperate deciduous forest, *Oecologia*, 197(4), 971-988, <https://doi.org/10.1007/s00442-021-04891-1>, 2021.
- Zheng, Y., Unger, N., Tadić, J. M., Seco, R., Guenther, A. B., Barkley, M. P., Potosnak, M. J., Murray, L. T., Michalak, A. M., Qiu, X., Kim, S., Karl, T., Gu, L., and Pallardy, S. G.: Drought impacts on photosynthesis, isoprene emission and atmospheric formaldehyde in a mid-latitude forest, *Atmos. Environ.*, 167, 190-201, <https://doi.org/10.1016/j.atmosenv.2017.08.017>, 2017.
